# Supplementary material for: Triphenylarsonium-functionalised gold nanoparticles: potential nanocarriers for intracellular therapeutics
Source: Royal Society of Chemistry journal article supplement (doi:10.1039/c4cc09304f), 2015-01-01
Supplement: c4cc09304f1.pdf [file c4cc09304f1.pdf]

## Supplementary Information

### Triphenylarsonium-functionalised gold nanoparticles: potential nanocarriers for intracellular therapeutics

Nikhil Lalwani,<sup>a</sup> Yu-Su Chen,<sup>a</sup> Gemma Brooke,<sup>a</sup> Neil A. Cross,<sup>a</sup> David W. Allen,<sup>a</sup> Alan Reynolds,<sup>b</sup> Jesus Ojeda,<sup>b</sup> Graham J. Tizzard,<sup>c</sup> Simon J. Coles<sup>c</sup> and Neil Bricklebank<sup>a\*</sup>

<sup>a</sup> Biomedical Research Centre, Sheffield Hallam University, City Campus, Sheffield S1 1WB, UK.

<sup>b</sup> Experimental Techniques Centre, Brunel University, Kingston Lane, Uxbridge, Middlesex, UB8 3PH, UK.

<sup>c</sup> EPSRC National Crystallography Service, School of Chemistry, University of Southampton, Southampton, SO17 1BJ, UK

### Materials

All reagents and solvents were purchased from Sigma-Aldrich or Fisher Scientific and used as received.

### Characterisation

<sup>1</sup>H and NMR spectra were obtained in deuterated chloroform (CDCl<sub>3</sub>) or deuterated dichloromethane (CD<sub>2</sub>Cl<sub>2</sub>) on a Bruker AVANCE III (400 MHz) NMR spectrometer. Electrospray Ionization Mass Spectrometry Samples were dissolved in EtOH: DIH<sub>2</sub>O (50:50) to a concentration of approximately 1 mg/mL for molecular ion determination. Electrospray mass spectra were recorded using a Thermo Finnigan MAT LCQ classic electrospray ionisation mass spectrometer (ESI-MS) (Thermo Scientific, San Jose, California, USA) in positive ion mode. Samples were introduced by direct infusion using the syringe pump on the instrument at a flow rate of 5 µL/min with an acquisition time of one minute. IR spectra were recorded using a Bruker Alpha Platinum ATR FTIR spectrometer. Elemental analyses were carried out by MEDAC Ltd (Chobham, Surrey, UK). Ultraviolet-visible absorption spectra of aqueous colloidal solutions were recorded at room temperature on a Jenway 6715 UV/Vis spectrophotometer. Transmission electron micrographs of AuNPs were obtained on a Jeol 2000 FX transmission electron microscope (TEM) (ETC, Brunel University, Middlesex, UK), set at 100 KV. Freeze-dried AuNP samples were re-suspended in ethanol, and placed on a Holey coated copper grid, and the grids were left to dry in air at room temperature. Particle

size distribution was obtained over 1000 AuNPs using Abel imaging software. XPS measurements were made on a VG Escalab 210 Photoelectron Spectrometer. The X-ray source was a non-monochromated Al K $\alpha$  source (1486.6 eV), operated with an X-ray emission current of 20 mA and an anode high tension (acceleration voltage) of 12 kV. The freeze-dried sample was placed on a standard sample stud employing double sided adhesive tape and the take-off angle was fixed at 90° relative to the sample plane. The area corresponding to each acquisition was of 0.79mm<sup>2</sup>. Each analysis consisted of a wide survey scan (pass energy 50 eV, 1.0 eV step size) and high-resolution scans (pass energy 50 eV, 0.05 eV step size) for component speciation. The binding energy scale of the instrument was calibrated using the Au 4f<sub>5/2</sub> (83.9 eV), Cu 2p<sub>3/2</sub> (932.7 eV) and Ag 3d<sub>5/2</sub> (368.27 eV) lines of cleaned gold, copper and silver standards from the National Physical Laboratory (NPL), UK. The software CasaXPS 2.3.15 was used to fit the XPS spectra peaks, and the binding energies obtained in the XPS spectra were corrected for specimen charging by referencing the C 1s to 284.6 eV.

### **Synthesis of the 3-triphenylarsoniopropylthiosulfate zwitterion (3) and triphenylarsoniumpropylthioacetate bromide (4).**

Compounds **3** and **4** were prepared from the bromopropyltriphenylarsonium bromide, which was obtained in high yield using the method of Moorhoff.<sup>1</sup>

#### ***Tripheylarsoniopropylthiosulfate zwitterion 3***

Bromopropyltriphenylarsonium bromide (0.250 g,  $4.9 \times 10^{-4}$  mol) was refluxed overnight with Na<sub>2</sub>S<sub>2</sub>O<sub>3</sub> (0.212 g,  $8.56 \times 10^{-4}$  mol) in aqueous EtOH. Zwitterion **3** was isolated from this mixture by extraction with dichloromethane (3 x 10 mL) and purified by triturating with diethyl ether to yield **3** as a white solid in 59% yield, m.p. 168°C. Elemental Analysis: found: C, 54.46; H, 4.40; S 13.94. C<sub>21</sub>H<sub>21</sub>AsO<sub>3</sub>S<sub>2</sub> requires: C, 54.78; H, 4.56; S 13.91. IR  $\nu_{\max}$ /cm<sup>-1</sup> 3020 and 2912 (CH), 1483, 1438, 1209 (SO), 1082 1010 (SO), 744, 688, 623, 523, 466. <sup>1</sup>H NMR:  $\delta$  2.3 (2H, m), 3.2 (2H, t), 3.6 (2H,m), 7.6–7.9 (15H, m) ppm . ESI-MS: 460.89 [M]<sup>+</sup>, 461.97 [M+H<sup>+</sup>], 482.90 [M+Na<sup>+</sup>].

#### ***Tripheylarsoniumpropylthioacetate bromide 4***

Bromopropyltriphenylarsonium bromide (0.250 g,  $4.9 \times 10^{-4}$  mol) was refluxed overnight under nitrogen with KSC(O)CH<sub>3</sub> (0.098 g,  $8.56 \times 10^{-4}$  mol) in aqueous EtOH. Thioacetate

salt **4** was isolated from this mixture by extraction with dichloromethane (3 X 10 mL) and purified by triturating with diethyl ether as a white solid in 44% yield. m.p. 234 - 238°C. Elemental Analysis: found: C, 54.97; H, 4.81; S 6.42. C<sub>22</sub>H<sub>24</sub>AsOS requires: C, 54.87; H, 4.77; S 6.36. IR  $\nu_{\max}/\text{cm}^{-1}$  3020 and 2910 (CH), 1683 (CO), 1482, 1436, 1136 1084, 995, 950, 760, 740, 625, 494. <sup>1</sup>H NMR:  $\delta$  1.6 (3H, s), 2.1 (2H, m), 3.2 (2H, t), 3.8 (2H,m), 7.6–7.9 (15H, m) ppm. ESI-MS: 423.13 [M]<sup>+</sup>, 424.13 [M+H<sup>+</sup>].

## X-Ray Crystallography

**Table 1** Crystallographic data summary

| Compound reference                                                                     | <b>3</b>                                                        | <b>4</b>                               |
|----------------------------------------------------------------------------------------|-----------------------------------------------------------------|----------------------------------------|
| Chemical formula                                                                       | C <sub>21</sub> H <sub>21</sub> AsO <sub>3</sub> S <sub>2</sub> | C <sub>23</sub> H <sub>24</sub> AsBrOS |
| Formula Mass                                                                           | 460.42                                                          | 503.31                                 |
| $\lambda/\text{\AA}$                                                                   | 0.71075                                                         | 0.71075                                |
| T/K                                                                                    | 100(2)                                                          | 100(2)                                 |
| Space group                                                                            | <i>P</i> 2 <sub>1</sub> / <i>n</i>                              | <i>P</i> 2 <sub>1</sub> / <i>n</i>     |
| <i>a</i> /\AA                                                                          | 11.687(5)                                                       | 11.1700(3)                             |
| <i>b</i> /\AA                                                                          | 14.366(6)                                                       | 13.6075(4)                             |
| <i>c</i> /\AA                                                                          | 12.127(5)                                                       | 14.4757(10)                            |
| $\alpha/^\circ$                                                                        | 90                                                              | 90                                     |
| $\beta/^\circ$                                                                         | 106.254(5)                                                      | 91.738(7)                              |
| $\gamma/^\circ$                                                                        | 90                                                              | 90                                     |
| <i>V</i> /\AA <sup>3</sup>                                                             | 1954.7(14)                                                      | 2199.23(18)                            |
| <i>Z</i>                                                                               | 4                                                               | 4                                      |
| $\mu/\text{mm}^{-1}$                                                                   | 1.972                                                           | 3.467                                  |
| <i>F</i> (000)                                                                         | 944                                                             | 1016                                   |
| 2 $\theta/^\circ$                                                                      | 55.0                                                            | 55.0                                   |
| No. of reflections measured                                                            | 10357                                                           | 13491                                  |
| No. of independent reflections                                                         | 3852                                                            | 4973                                   |
| <i>R</i> <sub>int</sub>                                                                | 0.0510                                                          | 0.0274                                 |
| GOOF                                                                                   | 1.143                                                           | 0.960                                  |
| Final <i>R</i> <sub>I</sub> values ( <i>I</i> > 2 $\sigma$ ( <i>I</i> ))               | 0.0730                                                          | 0.0267                                 |
| Final <i>wR</i> ( <i>F</i> <sup>2</sup> ) values ( <i>I</i> > 2 $\sigma$ ( <i>I</i> )) | 0.1111                                                          | 0.0530                                 |
| Final <i>R</i> <sub>I</sub> values (all data)                                          | 0.0858                                                          | 0.0398                                 |
| Final <i>wR</i> ( <i>F</i> <sup>2</sup> ) values (all data)                            | 0.1173                                                          | 0.0641                                 |

Single-crystal X-ray diffraction analyses of **3** and **4** were performed using a Rigaku Saturn 724+ area detector mounted at the window of an FR-E+ rotating anode generator with a Mo anode ( $\lambda=0.71075\text{\AA}$ ) and equipped with an Oxford Cryosystems cryostream device. The crystals were mounted on a MiTeGen MicroLoops and the data were collected at 100K. Data were processed and empirical absorption corrections were carried out using CrystalClear SM-Expert.<sup>2</sup> The structures were solved by charge-flipping using SUPERFLIP<sup>3</sup> and refined on *F*<sub>o</sub><sup>2</sup> by full-matrix least squares refinement using SHELXL-97<sup>4</sup>. All non-hydrogen atoms were refined with anisotropic displacement parameters. Hydrogen atoms were added at

calculated positions to carbon atoms with isotropic displacement parameters based on the equivalent isotropic displacement parameter ( $U_{eq}$ ) of the parent atom. Detailed crystallographic parameters are given in Table 1 below. The CIF files for the crystal structures have been deposited with the CCDC and been given the deposition numbers 1020083 (**3**) and 1020084 (**4**).

### **Synthesis of Triphenylarsonium-Functionalised Gold Nanoparticles**

Triphenylarsonium-functionalised AuNPs were synthesised based on methods described previously.<sup>5,6</sup> In brief, a solution of the triphenylarsonium compound (0.25 mmol) was prepared in  $\text{HAuCl}_4$  (0.12 mmol) and dichloromethane (15 mL). The solution was stirred vigorously under nitrogen for 6 hours; subsequently an aqueous solution of  $\text{NaBH}_4$  (3 mL, 400 mmol  $\text{L}^{-1}$ ) was added drop wise followed by the addition of deionised  $\text{H}_2\text{O}$  (15 mL) and stirred under nitrogen overnight. After 24 hours the colloidal solution was purified by dichloromethane extraction (3 x 10 mL), freeze dried, flushed with nitrogen and retained for further analysis. UV/vis  $\lambda_{\text{max}}(\text{H}_2\text{O})/\text{nm}$  520. IR  $\nu_{\text{max}}/\text{cm}^{-1}$  2262 (CH), 1639, 1340(br), 1064(br), 868, 808 680.

### **Cell Biology**

Human prostate cancer cells (PC3) were maintained in complete media (cDMEM) which contains Dulbecco's modified Eagle medium with GlutaMAX, 4.5 g/L D-Glucose and sodium pyruvate (Invitrogen Life Technologies, Paisley, Renfrewshire, UK) containing 10% heat-inactivated fetal bovine serum (Biosera, East Sussex, Sussex, UK) and 1% penicillin-streptomycin (Invitrogen Life Technologies, Paisley, Renfrewshire, UK) at 37°C in 5%  $\text{CO}_2$  and 95% air. Cells were routinely sub-cultured every 3 days, and routinely screened for mycoplasma.

### **Cytotoxicity Assay**

Cytotoxicity was assessed using CellTitre-Glo luminescent cell viability assay kit (Promega Corporation, Southampton, Hampshire, UK). PC3 cells were seeded in opaque-walled 96-well plates at a density of 10,000 cells/well and allowed to adhere overnight. Cells were subsequently treated with the corresponding arsonium ligand (0-1,000  $\mu\text{M}$ ) for 24, 48 and 72 hours. After each incubation period, cell viability was measured according to the manufacturer's instructions. Plates were equilibrated at room temperature for 30 minutes, 100  $\mu\text{L}$  of assay reagent was added to each well, placed on an orbital shaker for 2 minutes, left to

stand at room temperature for 10 minutes and read on a Wallac Victor2 1420 multilabel counter (PerkinElmer, Cambridge, Cambridgeshire, UK). All plates contain control wells and all measurements were performed in quadruplicates and three independent experiments were conducted (n = 12). Data are expressed as a percentage of live cells normalised to control, and the average, standard deviation and IC<sub>50</sub> values were plotted and calculated using GraphPad Prism (GraphPad software, La Jolla, California, USA).

Cytotoxicity studies were also investigated using MTT assay to determine the cellular uptake of these compounds on PC3 cells. The MTT solutions were prepared (5mg of MTT/ml), filter sterilized and stored at 4°C for use within 2 weeks. The cells (PC3) were grown overnight in 96 well plates at a density of 10,000 cells/well. After 24 hours of incubation the plates were inverted, flicking off the medium and were replaced with required drug concentration of corresponding ligands **3** and **4** (0-1000µM) for 24, 48 and 72 hours. After the respective incubation periods, plates were removed from the incubator for the addition of 20µL of MTT solution to each well. The plates were then again incubated for a further 4 hours at 37°C. After 4 hours, the medium was removed and 100µL of acid-isopropanol was added to each well for the development of formazan crystals in the cell layer to dissolve. The absorbance was then measured at 570nm on a Wallac Victor2 1420 multilabel counter. The IC<sub>50</sub> was then determined for each compound (**3** and **4**) from a plot of log drug concentration versus percentage of cell normalised to control. The MTT assay study for **3** showed that (Fig 3c) the IC<sub>50</sub> values were found to 89.99, 51.99, 71.86µM for 24, 48 and 72hours respectively. The MTT assay study for **4** showed that (Fig 3d) the IC<sub>50</sub> values were found to 74.65, 43.69, 74.94µM for 24, 48 and 72hours respectively. IC<sub>50</sub> values were plotted and calculated using GraphPad Prism.

## References

1. C. Moorhoff, *Synthetic Communications*, 1998, **28**, 2925 – 2935.
2. CrystalClear 3.1, Rigaku Corporation, The Woodlands, Texas, U.S.A., 2013.
3. L. Palatinus and G. Chapuis, *J. Appl. Cryst.*, 2007, **40**, 786-790.
4. G.M. Sheldrick, *J. Appl. Cryst.*, 2011, **44**, 1281-1284.
5. Y. Ju-Nam, N. Bricklebank, D.W. Allen, P. H. E. Gardiner, M. E. Light and M.B. Hursthouse, *Organic and Biomolecular Chemistry*, 2006, **4**, 4345 – 4351.
6. Y. Ju-Nam, D. W. Allen, P. H. E. Gardiner and N. Bricklebank, *J. Organomet. Chem.*, 2008, **693**, 3504 – 3508.
